# Supplementary material for: The podoplanin-CLEC-2 interaction promotes platelet-mediated melanoma pulmonary metastasis
Source: Springer Nature journal article supplement (doi:10.1186/s12885-024-12194-w), 2024-04-01
Supplement: MOESM1 [file 26928116]

Figure 1 Panel C

Original image for western blot

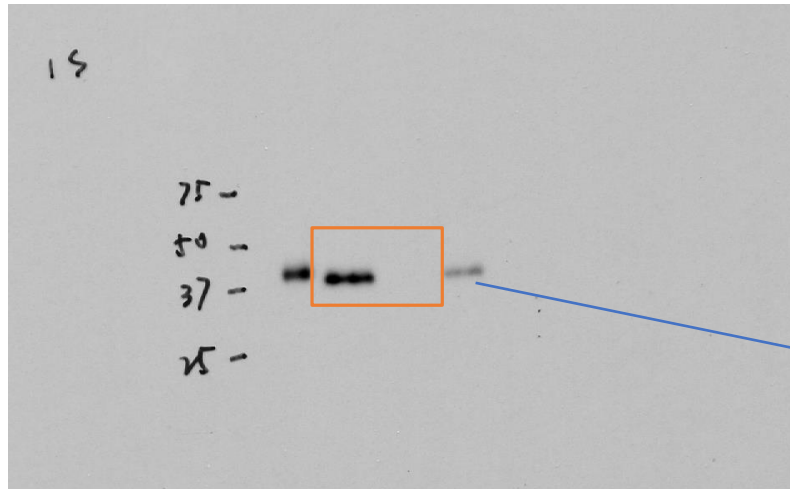

Cropped image for western blot in the manuscript

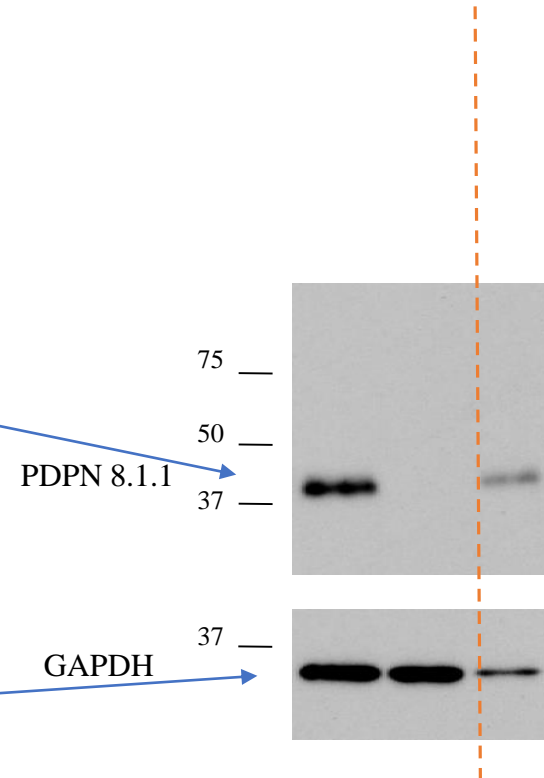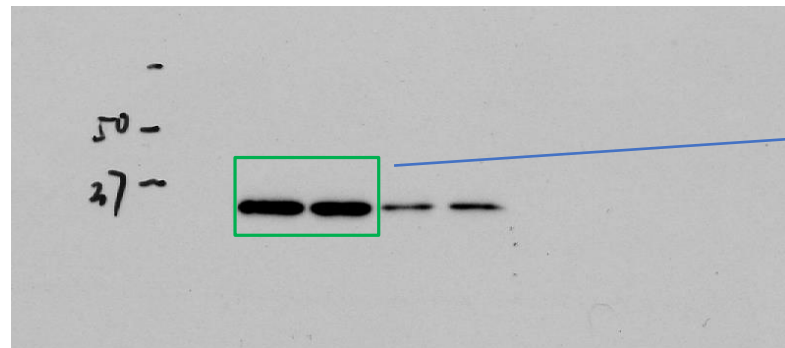

The image in the right of red line was cropped

Western blot Film For  
Figure 1 Panel C

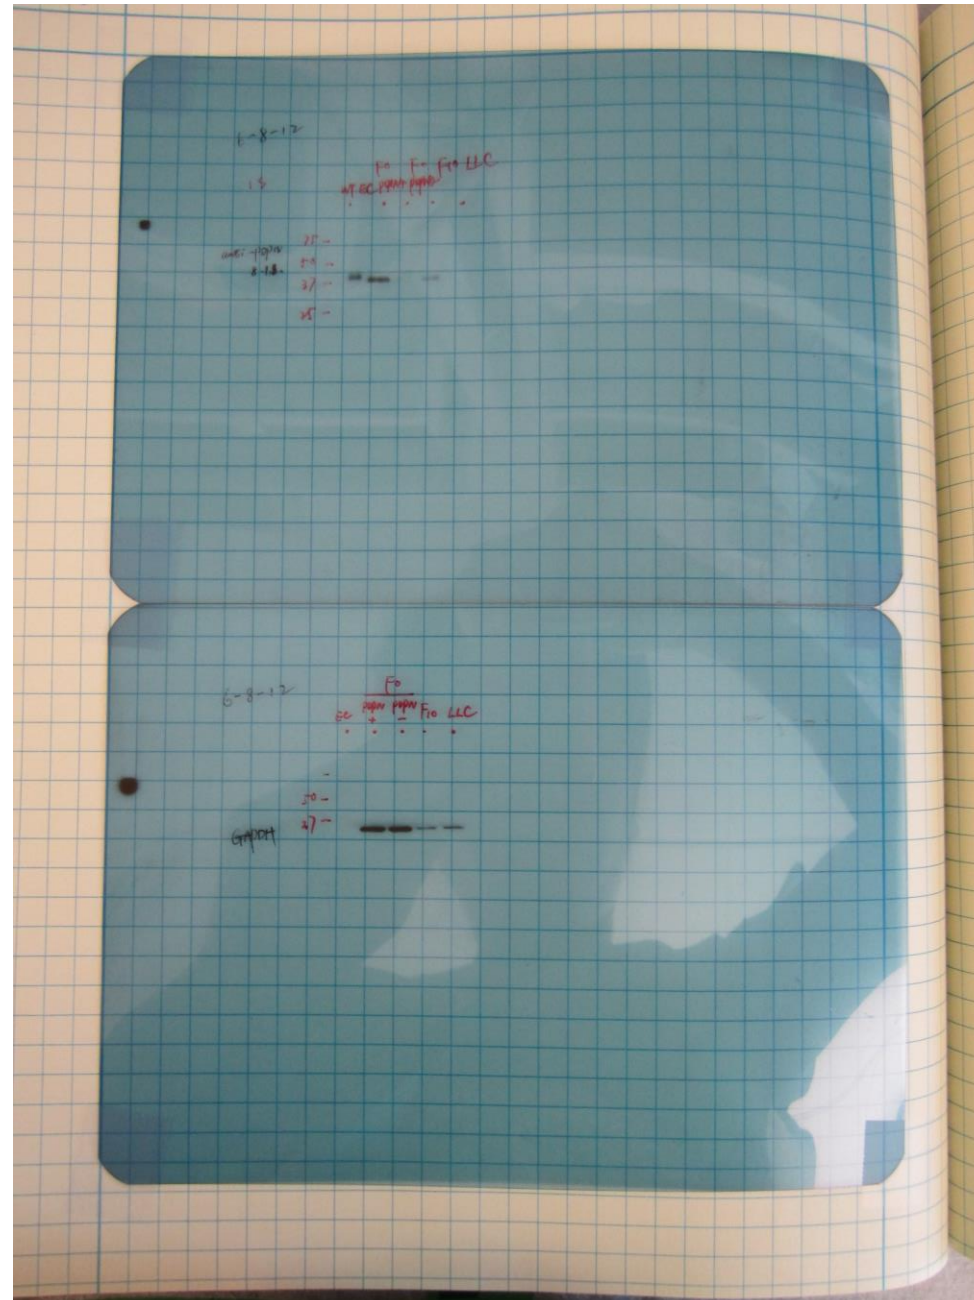

Figure 5 Panel D

Original image for western blot

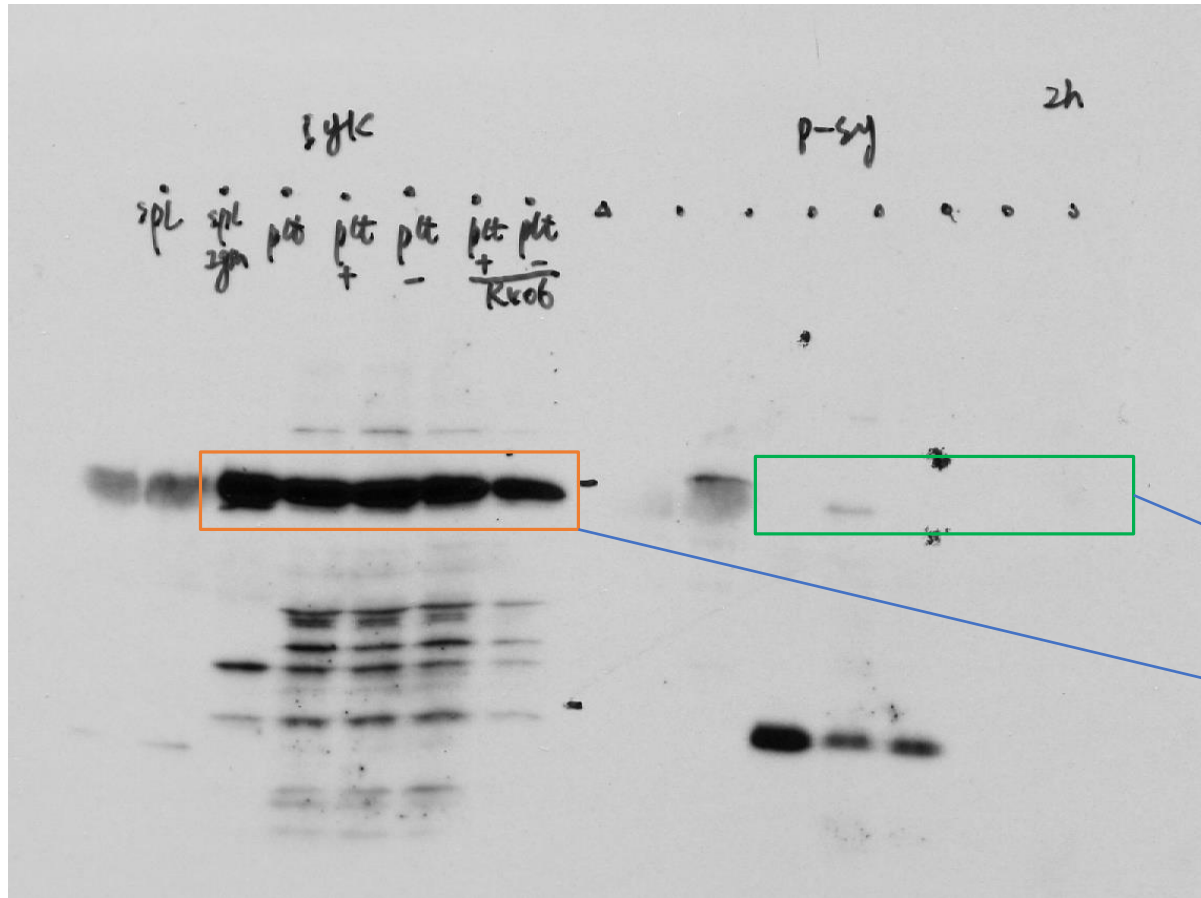

Cropped image for western blot in the manuscript

**D**

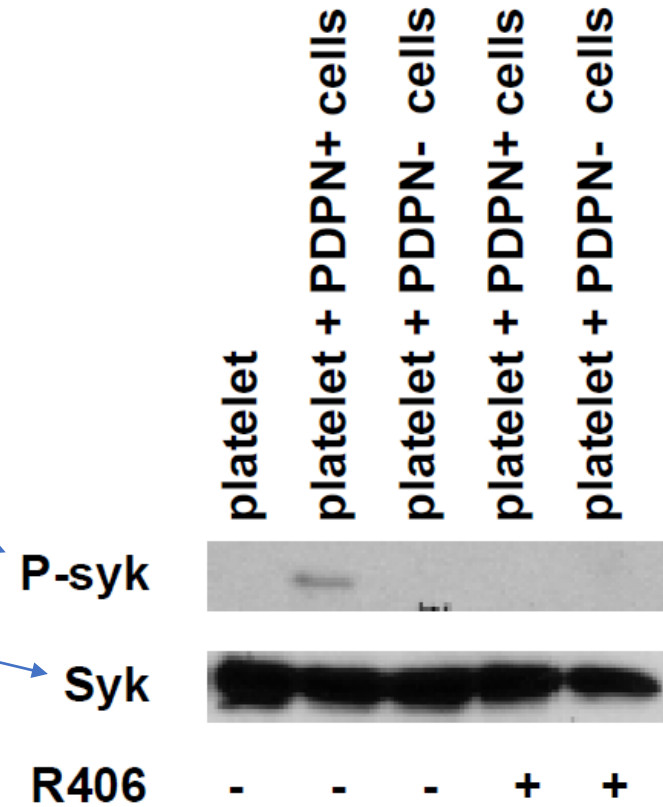

Western blot Film For  
Figure 5 Panel D

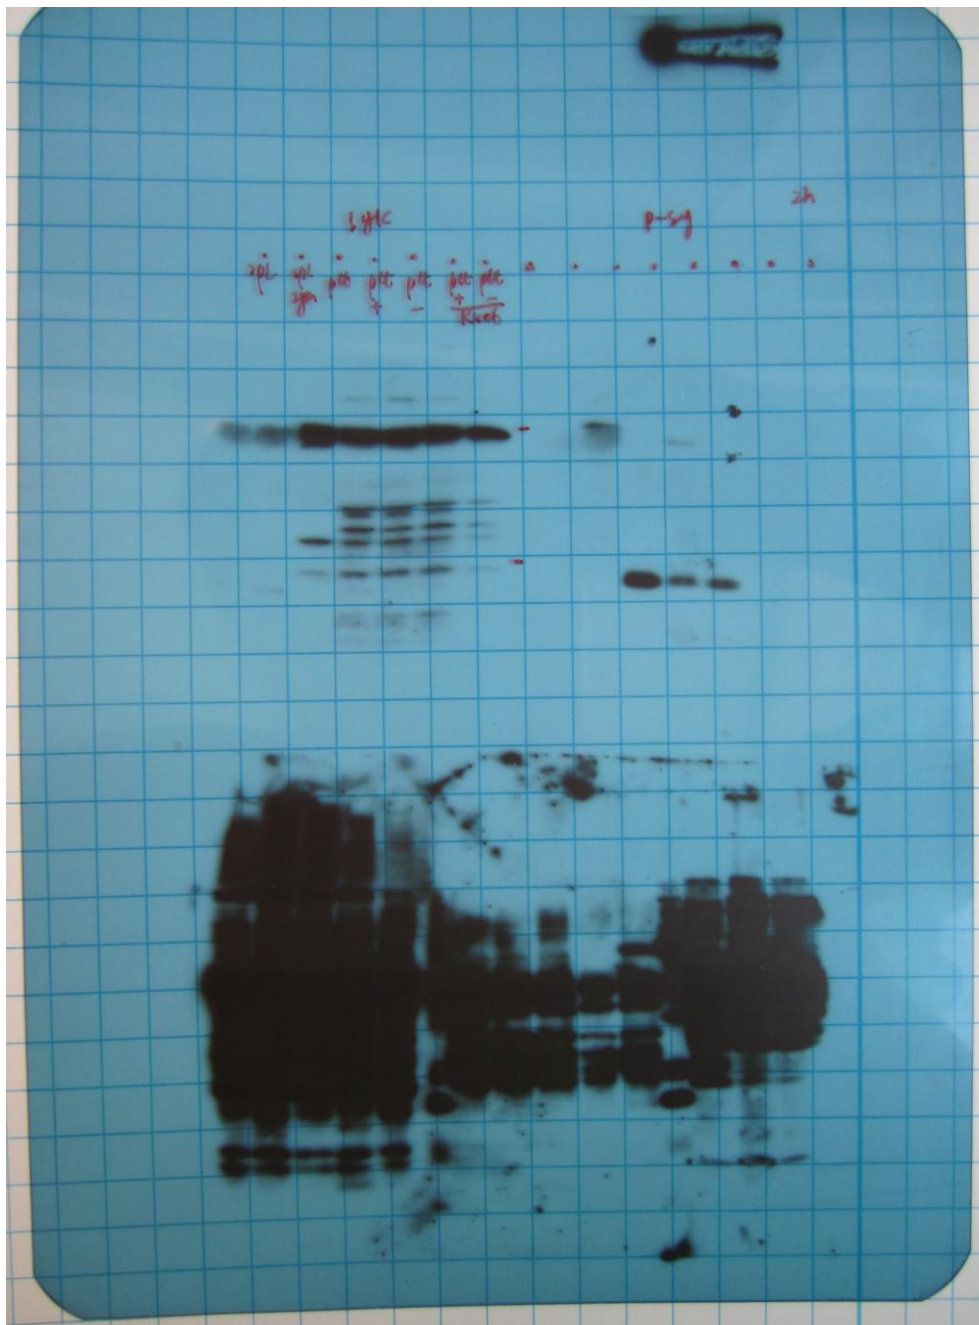

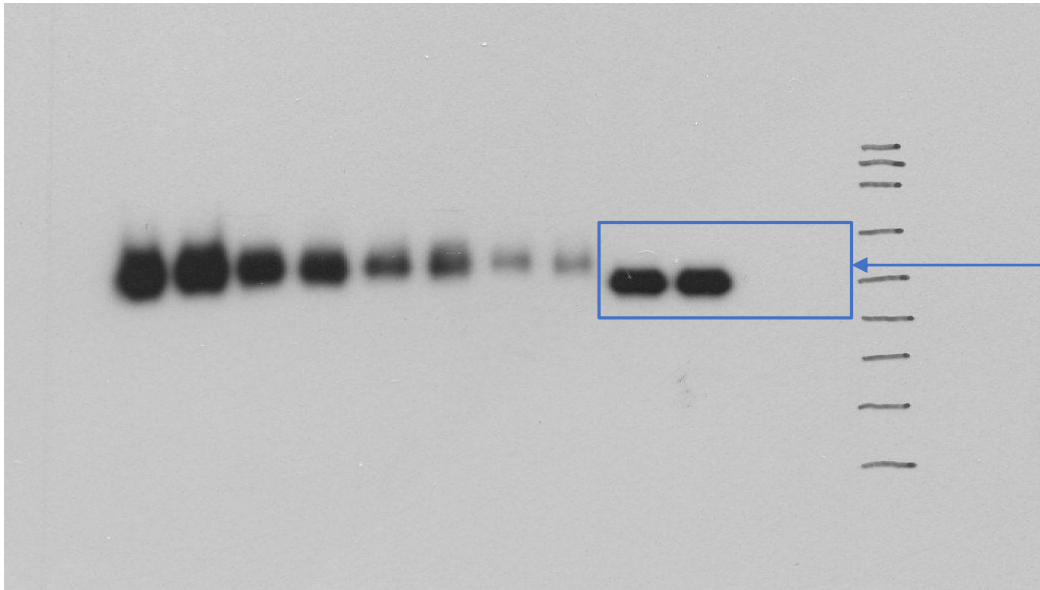

CLCE-2

Cropped image of  
Western blot Film For  
Supplement Figure 2  
Panel B

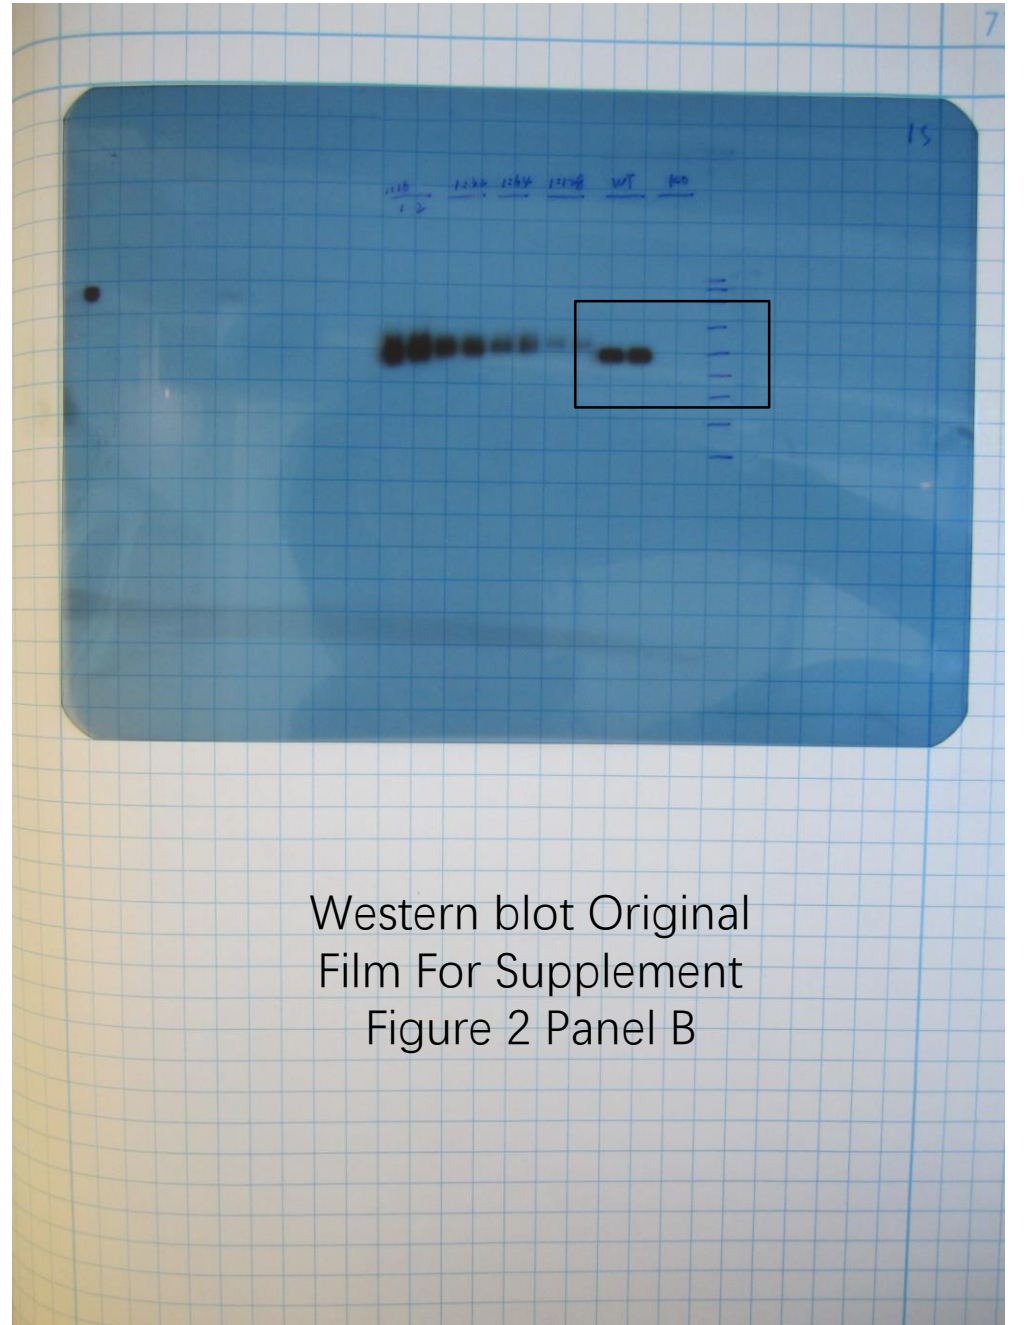

Western blot Original  
Film For Supplement  
Figure 2 Panel B

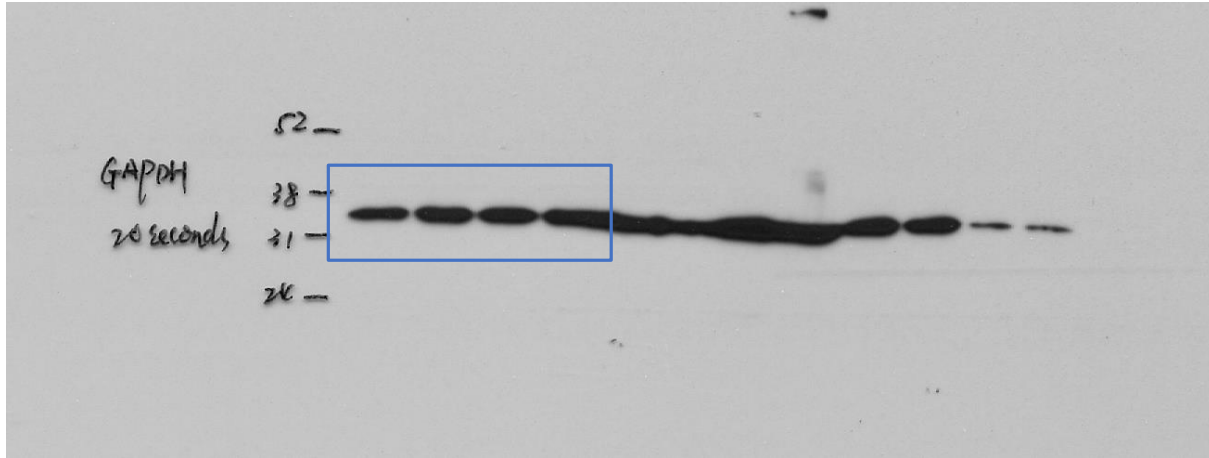

Cropped image of  
Western blot Film For  
Supplement Figure 2  
Panel B

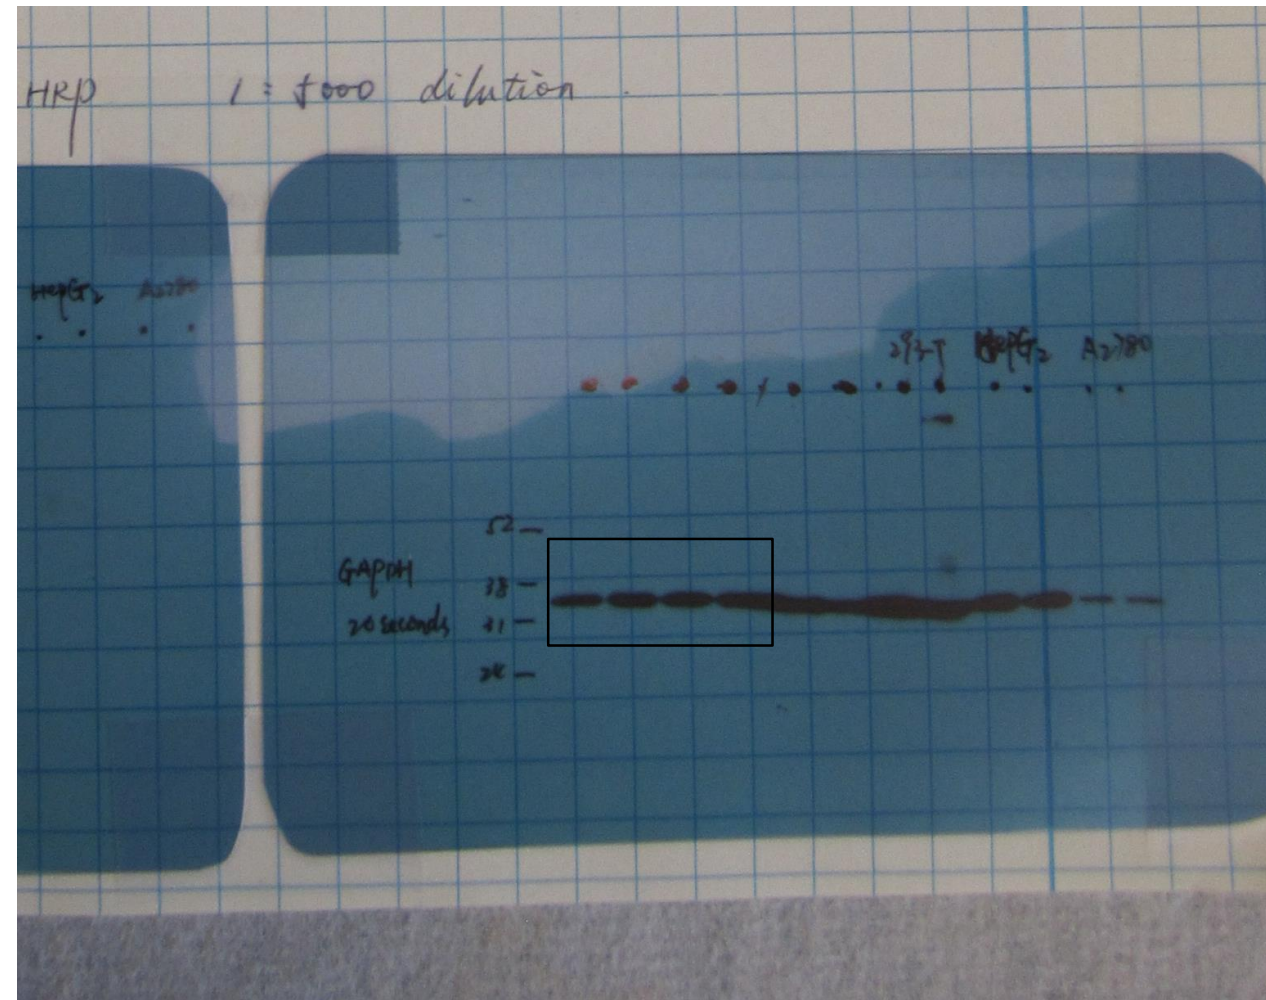

Western blot Original  
Film For Supplement  
Figure 2 Panel B
