# Supplementary material for: The podoplanin-CLEC-2 interaction promotes platelet-mediated melanoma pulmonary metastasis
Source: Springer Nature journal article supplement (doi:10.1186/s12885-024-12194-w), 2024-04-01
Supplement: MOESM2 [file 26928116]

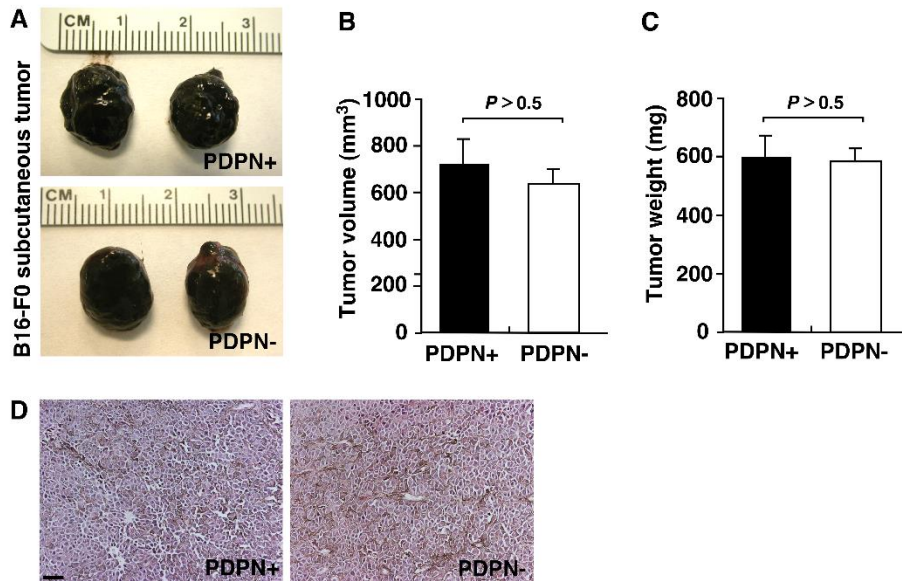

**Sup. Figure 1. Podoplanin and CLEC-2 interaction does not confer *in vitro* melanoma cell growth and *in vivo* tumor growth**

(A).  $2 \times 10^5$  B16-F0 PDPN<sup>+</sup> and PDPN<sup>-</sup> cells were injected subcutaneously into WT C56BL/6J mice respectively. 14 days later, the mice were sacrificed and the tumors were removed. Representative gross images of subcutaneous tumor tissue of each group were shown. (B). and (C). Tumor volume (volume =  $1/2$  length  $\times$  width<sup>2</sup>) and tumor weight of each group were measured. Even the volume and weight of PDPN<sup>+</sup> cells tumor were higher than PDPN<sup>-</sup> cells tumors, but they have no statistical significance ( $P > 0.5$ ). (D). Representative images of H&E staining of subcutaneous tumor tissue section. The histology of PDPN<sup>+</sup> cell injection tumor tissue is similar with that of PDPN<sup>-</sup> cells injection tumor tissue.

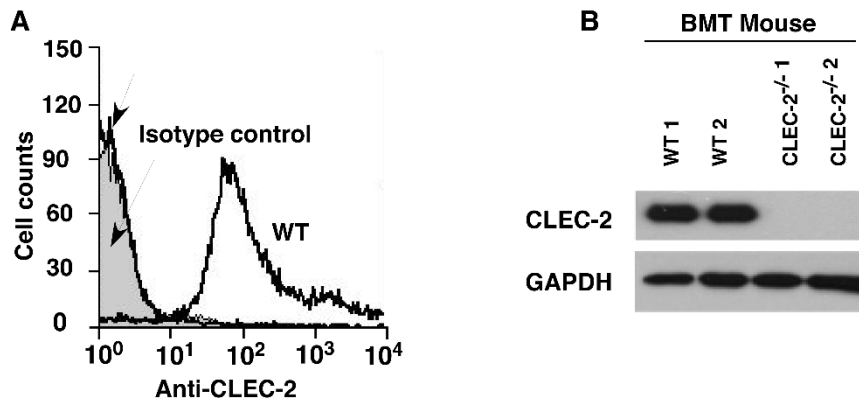

**Sup. Figure 2. CLEC-2 deplete efficiency in CLEC-2 deficient mouse**

(A). Flow cytometry profile shows CLEC-2 deplete efficiency in CLEC-2 KO mouse and WT mouse after bone marrow transplantation. Whole blood from BMT CLEC-2 KO mice and WT mice 4 weeks after bone marrow transplantation were incubated with Biotinylated anti-CLEC1B mAb and treptavidin-PE. Biotinylated rat IgG 2b was used as isotype control. (B). Western blot detection of CLEC-2 expression in the cell lysates of Wild type mouse and CLEC-2 deletion mouse.
